# Supplementary material for: Origin of the Harappan Ernestites: Geochemical Insights into Provenance and Fabrication
Source: Research Square preprint supplement (doi:10.21203/rs.3.rs-6780927/v1), 2025-06-20
Supplement: Supplementary file 2 [file a2b3734ee80b6224bbbb9978.xlsx]

## Sheet: Major Elements
Supplementary Data 1. Major element contents (oxide wt%) of Ernestite, Laterite and Sandstone.
	Ernestite		Laterite		Sandstone		Standards
Elements*	Bhagatrav	Dholavira	LAT1	LAT2	ST1	ST2	OU-6m	OU-6r	VL1m	VL1r	MAG1m	MAG1r
SiO2	46.96	61.22	32.31	32.61	68.42	67.57	57.35	57.35 ± 0.3	1.35	1.16	50	49.74
TiO2	2.47	1.37	1.32	1.34	0.84	0.81	1	0.99 ± 0.01	3.14	3.15	0.77	0.7
Al2O3	28.77	20.88	8.77	8.89	13.26	13.19	20.44	20.45 ± 0.31	37.18	37.38	15.72	16.44
Fe2O3T	9.08	2.09	37.04	36.76	2.06	2.09	8.93	8.94 ± 0.2	36.19	35.17	6.93	6.7
MnO	0.02	0.02	0.04	0.04	0.03	0.03	0.28	0.28 ± 0.003	0.02	na	0.09	0.1
MgO	0.44	0.65	0.03	0.02	1.53	1.56	2.41	2.41 ± 0.025	nd	na	2.98	2.98
CaO	0.18	0.37	1.61	1.59	1.93	2.1	0.76	0.74 ± 0.011	0.03	na	1.36	1.5
Na2O	0	0	0.05	0.05	0.63	0.53	1.76	1.76 ± 0.05	nd	na	3.85	3.9
K2O	0.64	0.42	0.02	0.02	1.84	1.83	3.04	3.03 ± 0.03	0.02	na	3.72	3.6
P2O5	0.05	0.06	0.08	0.08	0.1	0.1	0.11	0.12 ± 0.004	nd	na	0.16	0.32
Note: * = XRF whole-rock data. Superscripts: T = total; m = measured; r = recommended.
Errors (reproducibility) are at 2s. Penrhyn Slate OU-6 (from IAG), Venezuela Laterite VL-1 (from I.V.I.C., Venezuela) and Marine Mud MAG-1 (from USGS) were used as the standards, and their recommended values are from Potts and Kane (2003), Schorin and Labrecque (1983) and Manheim et al. (1976) respectively.
References
Potts P.J. and Kane J.S. (2003). International Association of Geoanalysts Certificate of Analysis: Certified Reference Material OU-6 (Penrhy Slate). Geostandards and Geoanalytical Research, 29, 233-236.
Schorin, H., & Labrecque, J. J. (1983). A Laterite Standard Reference Material: Venezuelan Laterite VL‐1. Geostandards Newsletter, 7(1), 233-242.
Manheim, F. T., Hathaway, J. C., Flanagan, F. J., & Fletcher, J. D. (1976). Marine mud, MAG-1, from the Gulf of Maine. In Descriptions and Analyses of Eight New USGS Rock Standards, 840, 25-28.

## Sheet: Trace Elements
Supplementary Data 1. Trace element concentrations (in ppm) of the Ernestites
Element*	Bhagatrav	Dholavira	BHVO-2m	BHVO-2r
Sc	35.5	17.4	30.7± 0.5	31.8± 0.3
V	166	69	323± 5	318± 2
Cr	154	83	281± 6	287± 3
Co	12.84	7.11	45.13± 0.32	44.89± 0.28
Ni	69.05	22.98	117.1± 1.8	119.8± 1.2
Cs	3	0.5	0.102± 0.004	0.099± 0.002
Rb	35.34	18.13	9.424± 0.204	9.261± 0.096
Ba	329.94	225.39	134.7± 2.3	130.9± 1.0
Th	19.84	18.89	1.31± 0.02	1.22± 0.02
U	2.85	1.95	0.44± 0.01	0.41± 0.04
Nb	34.7	21.56	17.6± 0.6	18.1± 0.2
Ta	4.81	1.65	1.21± 0.02	1.15± 0.02
La	84.31	67.16	15.6± 0.3	15.2± 0.1
Ce	142.64	124.15	37.3± 0.4	37.5± 0.2
Pr	13.6	13.79	5.47± 0.06	5.34± 0.03
Pb	25.07	21.58	1.84± 0.07	1.65± 0.04
Sr	30.08	55.06	402.0± 5.8	394.1± 1.7
Nd	47.68	39.71	25.0± 0.3	24.3± 0.3
Hf	3.59	2.99	4.67± 0.05	4.47± 0.03
Zr	110.68	96.42	173.9± 1.4	171.2± 1.3
Sm	8.67	6.11	6.26± 0.11	6.02± 0.06
Eu	2.08	1.52	2.14± 0.04	2.04± 0.01
Gd	9.62	8.05	6.48± 0.09	6.21± 0.04
Tb	1.27	0.83	0.99± 0.02	0.94± 0.01
Dy	7.19	3.82	5.58± 0.09	5.28± 0.03
Y	28.66	15.17	25.83± 0.23	25.91± 0.28
Ho	1.325	0.719	1.028± 0.011	0.989± 0.005
Er	3.65	2.14	2.637± 0.054	2.511± 0.014
Tm	0.49	0.29	0.351± 0.009	0.335± 0.003
Yb	3.39	2.02	2.127± 0.048	1.994± 0.027
Lu	0.44	0.284	0.293±0.003	0.275± 0.002
Note: *Q-ICPMS data. Superscripts: m = measured; r = recommended. Errors (reproducibility) are at 2s.
Recommended values are from Jochum et al. (2016)
References
Jochum, K. P., Weis, U., Schwager, B., Stoll, B., Wilson, S. A., Haug, G. H., ... & Enzweiler, J. (2016). Reference values following ISO guidelines for frequently requested rock reference materials. Geostandards and Geoanalytical Research, 40(3), 333-350.
