# Supplementary material for: Origin of the Harappan Ernestites: Geochemical Insights into Provenance and Fabrication
Source: Research Square preprint supplement (doi:10.21203/rs.3.rs-6780927/v1), 2025-06-20
Supplement: Supplementary file 3 [file ee972d097edf9d2e80158824.xlsx]

## Sheet: Aluminosilicates
Supplementary Data 2. EPMA data of aluminosilicates
Sample	ERN-KU						ERN-DV				E-2
Location	Kanmer						Dholavira				Bhagatrav
spot	1	2	3	4			1	2			1	2	3
SiO2	45.197	44.3142	49.7747	52.8114			40.3993	49.285			52.5465	45.1884	47.2842
TiO2	0.6303	0.222	0.212	0.1526			0.2147	0.1804			0.2623	0.7895	0.2673
Al2O3	49.1479	46.7691	46.6956	37.1861			52.3395	39.7883			45.1232	48.0962	46.7754
FeO	1.2669	0.8061	2.1711	0.8759			1.1575	0.9158			1.6962	1.6788	1.8704
MnO	0.0069	0.0098	0.0438	0.0058			0	0			0.0114	0.0189	0
MgO	0.0172	0.0546	0.1319	0.1498			0.1283	0.1051			0.1168	0.0993	0.1072
CaO	0.1069	0.019	0.1092	0			0.1115	0.0407			0.0827	0.087	0.073
Na2O	0	0.1132	0.1013	0.2571			0.1822	0.3117			0.0552	0.0901	0.1782
K2O	0.5035	4.9988	0.1146	6.6933			2.9459	6.4997			0.5811	0.7492	1.0231
P2O5	0.0643	0.1737	0.0451	0.0896			0.1167	0.2233			0.0545	0.0039	0
V2O3	0.03	0	0.0339	0			0.0044	0.0023			0.0111	0.0703	0.0291
NiO	0.0062	0	0	0			0	0.0227			0.0166	0.0085	0.0066
ZrO2	0.0661	0.034	0	0			0.0257	0.007			0.0274	0.0123	0.0325
SrO	0.0245	0.0724	0.031	0.0795			0.0097	0.0154			0.0132	0.0108	0
Nb2O5	0	0.0214	0.0329	0.0241			0.0214	0.0106			0.0353	0.0567	0.0216
BaO	0.0478	0.2218	0	0.5057			0.6661	0.1881			0.1013	0.0787	0.0671
Cr2O3	0	0.0294	0.0455	0.0485			0.0258	0.0276			0.0056	0.0136	0.0333
sum	97.1155	97.8595	99.5426	98.8794			98.3487	97.6237			100.74	97.0522	97.769

## Sheet: Quartz
Supplementary Data 2. EPMA data of quartz
Sample	ERN-KU			ERN-DV								E-2
Location	Kanmer			Dholavira								Bhagatrav
spot	1			1	2	3	4	5	6			1	2	3
SiO2	101.736			100.061	100.055	101.888	100.394	102.397	98.8288			96.4554	100.071	100.51
TiO2	0.0061			0.0135	0.0352	0	0	0.0068	0.0352			0.0854	0.0382	0.1528
Al2O3	0.1466			0.3116	0.1178	0.1557	0.0623	0.0274	2.2782			3.4958	0.1381	0.0814
FeO	0.155			0.0646	0.0713	0.0946	0.2484	0.0304	0.2661			0.1314	0.1106	0.3448
MnO	0.0222			0.0017	0.0046	0.0029	0.0098	0.0075	0.0017			0.0006	0	0.0058
MgO	0.191			0.0078	0	0.0071	0	0.0028	0.1051			0.0149	0.0071	0.0142
CaO	0			0.0007	0	0	0.0171	0.0099	0.0184			0.0197	0	0.0092
Na2O	0			0	0	0	0.0067	0	0.0255			0	0	0
K2O	0.0201			0	0.0122	0.0057	0.0013	0.0075	0.039			0.0832	0.0001	0.022
P2O5	0.0041			0	0	0	0.0081	0.002	0.0181			0	0.0221	0.0261
V2O3	0			0	0	0.0106	0.0145	0	0			0	0.019	0
NiO	0.0256			0.022	0	0.0105	0	0	0			0	0	0.0191
ZrO2	0.0014			0.0061	0	0	0	0.0108	0			0.0121	0.0277	0.0094
SrO	0.0174			0.0061	0	0.0051	0.0223	0.0424	0.0308			0	0.0141	0.0233
Nb2O5	0			0	0.0084	0	0	0.0028	0.0168			0.0671	0.0056	0
BaO	0			0	0	0.0091	0.0163	0.0064	0			0	0.0101	0.0059
Cr2O3	0.0143			0	0.0222	0.0041	0	0.0106	0.0261			0.0069	0	0
sum	102.34			100.495	100.326	102.194	100.801	102.564	101.69			100.373	100.464	101.224

## Sheet: Hematite
Supplementary Data 2. EPMA data of hematite
Sample	ERN-KU				ERN-DV			E-2
Location	Kanmer				Dholavira			Bhagatrav
spot	1	2			1			1	2
SiO2	0.1153	3.3076			6.564			1.9508	1.3264
TiO2	5.4294	4.6377			5.4746			8.1132	8.0619
Al2O3	15.124	13.7555			9.6111			4.5643	3.7771
FeO	72.5806	68.2126			66.3915			71.3407	74.5121
MnO	0.2736	0.2553			0.1373			0.1624	0.1298
MgO	0.3542	0.5932			0.6744			0.4691	0.4954
CaO	0.0017	0.0319			0.2272			0.0297	0.0097
Na2O	0	0			0.3741			0	0
K2O	0	0			0.2247			0.0183	0
P2O5	0	0.708			0.0484			0	0.0188
V2O3	0.507	0.357			0.941			0.4384	0.5595
NiO	0.0447	0.032			0.0018			0.5823	0.5598
ZrO2	0.0212	0.027			0.0082			0.0021	0.0249
SrO	0	0			0			0.0251	0.0028
Nb2O5	0	0			0			0	0
BaO	0.0447	0.0861			0.053			0.1314	0.1175
Cr2O3	0.2193	0.1173			0.0706			0.3354	0.3011
sum	94.7157	92.1212			90.8019			88.1632	89.8968

## Sheet: Fe-Ti phases
Supplementary Data 2. EPMA data of Fe-Ti phases
Sample	ERN-KU							ERN-DV																								E-2
Location	Kanmer							Dholavira																								Bhagatrav
spot	1	2	3	4	5	6		1	2	3	4	5	6	7	8	9	10	11	12	13	14	15	16	17	18	19	20	21				1	2	3	4	5	6	7	8	9
comment	Ilmenite	Ilmenite	Ilmenite	Ilmenite	Ilmenite	Ilmenite		Ilmenite	Ilmenite	Ilmenite	Ilmenite	Rutile	Titanohematite	Titanohematite	Ilmenite	Titanohematite	Ilmenite	Ilmenite	Ilmenite	Ilmenite	Ilmenite	Titanohematite	Titanohematite	Ilmenite	Titanohematite	Titanohematite	Titanohematite	Titanohematite				Titanohematite	Titanohematite	Titanohematite	Titanohematite	Titanohematite	Titanohematite	Titanohematite	Titanohematite	Titanohematite
SiO2	0.54	3.15	3.04	0.77	0.43	0.66		1.65	0.18	0	1.13	8.56	3.18	6.55	0.61	6.03	0.21	5.89	2.45	1.75	0.78	3.27	0.38	0.34	10.08	3.29	12.38	4.84				3.71	3.47	6.34	0.06	2.37	5.35	1.17	6.41	1.75
TiO2	52.92	51.18	52.16	51.87	51.75	52.23		49.88	53.67	54.68	58.78	80.33	47.82	41.86	48.41	47.62	52.19	47.31	48.28	51.48	50.48	47.37	48.77	49.79	40.13	43.88	45.82	45.62				38.84	37.1	34.12	36.97	32.72	29.38	36.76	31.44	33.18
Al2O3	4.7	3.78	3.85	4.1	0.33	3.86		4.39	4.12	5.02	3.3	0.92	8.69	7.56	4.34	5.35	4.07	5.27	4.92	3.68	6.48	7.04	4.7	2.92	21.13	10.2	6.7	5.33				8.63	8.38	13.49	5.25	6.42	11.18	6.12	12.61	6.46
FeO	34.11	35.48	35.89	36.2	41.86	36.45		33.7	33.6	32.92	30.25	6.02	33.59	31.9	36.07	30.59	34.34	34.61	35.32	32.74	32.59	35.28	36.1	37.15	28.5	32.24	32.9	35.87				41.17	41.41	40.07	47.03	46.63	40.14	45.44	41.77	49.51
MnO	0.16	0.15	0.1	0.14	1.64	0.11		0.02	0.06	0.03	0.03	0.01	0.02	0.03	0.02	0.04	0.03	0	0.04	0.05	0.01	0.01	0.03	0.02	0.03	0.01	0.02	0.04				0.21	0.12	0.16	0.1	0.07	0.09	0.13	0.11	0.09
MgO	1.99	1.61	1.95	2.87	1.23	1.51		1.98	1.99	1.89	2.01	0.64	0.87	2.57	1.33	1.96	2.14	1.58	1.45	2.22	1.99	1.18	1.61	1.27	1.14	1.93	1.59	0.88				2	0.95	1.16	1.07	0.74	0.98	1.08	0.82	0.63
CaO	0.02	0.02	0.01	0	0.02	0.03		0.04	0.02	0.02	0.01	0.06	0.04	0.04	0.04	0.02	0.02	0.02	0	0.08	0	0.02	0.01	0.02	0.06	0.08	0.01	0.05				0.01	0.05	0.04	0	0.01	0.2	0.04	0.02	0.03
Na2O	0	0	0	0	0	0		0	0	0	0	0.06	0	0.02	0	0	0	0.02	0	0.02	0.01	0	0	0	0.06	0.46	0.66	0				0	0	0.06	0.03	0.03	0.01	0.23	0	0.01
K2O	0	0	0	0	0	0.01		0	0.01	0	0	0.01	0.02	0.69	0.02	0.02	0	0.02	0	0.02	0.04	0	0.02	0.01	0.13	0.07	0.02	0.15				0.02	0.09	0.14	0	0.13	0.07	0.06	0.13	0.02
P2O5	0.03	0	0.02	0.01	0.01	0.04		0.11	0	0	0.03	0.04	0	0.04	0.03	0.02	0	0	0.01	0.01	0.04	0.05	0.11	0.02	0.03	0.06	0.03	0.02				0.01	0.04	0.22	0	0.01	0.11	0.01	0	0.02
V2O3	2.02	1.96	2.05	1.86	1.86	1.96		1.96	2.11	2.18	2.08	2.79	2.03	1.81	2.07	1.78	1.96	2.02	1.9	1.95	2.31	1.72	2.01	2.1	1.66	1.87	1.79	1.95				1.34	1.51	1.44	1.39	1.26	1.22	1.35	1.28	1.34
NiO	0.02	0.04	0.02	0.05	0.1	0		0.04	0.05	0.03	0.01	0	0.03	0.03	0	0.01	0.04	0.02	0.01	0.06	0.01	0.02	0.03	0	0.02	0.04	0	0.02				0.14	0.05	0.11	0.08	0.05	0.07	0.07	0.04	0.06
ZrO2	0.31	0.32	0.14	0.16	0.08	0.09		0.19	0.21	0.3	0.04	0.12	0.2	0.24	0.19	0.22	0.18	0.12	0.21	0.15	0.11	0.25	0.15	0.07	0.15	0.25	0.27	0.22				0.22	0.24	0.19	0.01	0.25	0.16	0.24	0.23	0.23
SrO	0.09	0	0.01	0	0	0		0.01	0	0.02	0	0	0	0.02	0.01	0.01	0.01	0	0	0.01	0	0.02	0	0	0	0	0	0.01				0.02	0.02	0	0.01	0	0	0	0.01	0
Nb2O5	0	0	0	0.02	0.02	0.04		0.05	0.07	0.01	0.06	0.02	0	0	0	0.07	0	0.02	0	0.01	0	0.03	0.07	0.06	0.04	0	0.02	0.08				0.02	0.02	0.01	0	0.02	0	0.01	0	0.03
BaO	1.09	0.81	0.91	0.89	0.88	0.81		0.92	1.05	1.19	1.18	1.51	0.87	0.89	0.78	0.97	0.9	0.93	0.85	1.3	0.98	0.94	0.94	0.96	0.8	0.82	0.92	0.98				0.75	0.66	0.75	0.66	0.58	1.07	0.74	0.7	0.72
Cr2O3	0.07	0.16	0.01	0.05	0.15	0.15		0.05	0.08	0.09	0.08	0.09	0.04	0.28	0.03	0.2	0.03	0.04	0.09	0.09	0.14	0.18	0.15	0.05	0.06	0.12	0.1	0.1				0.04	0.11	0.03	0.14	0.09	0.2	0.25	0.2	0.09
sum	98.07	98.66	100.16	98.99	100.36	97.95		94.99	97.22	98.38	98.99	101.18	97.4	94.53	93.95	94.91	96.12	97.87	95.53	95.62	95.97	97.38	95.08	94.78	104.02	95.32	103.23	96.16				97.13	94.22	98.33	92.8	91.38	90.23	93.7	95.77	94.17

## Sheet: Rutile
Supplementary Data 2. EPMA data of Rutile
Sample	ERN-KU				ERN-DV
Location	Kanmer				Dholavira
spot	1	2			1	2
SiO2	0.5177	0.6996			8.5558	0.5947
TiO2	94.344	94.4409			80.332	95.1857
Al2O3	0.3764	0.6062			0.9185	0.457
FeO	0.1239	0.0197			6.0204	1.2121
MnO	0	0.0092			0.0148	0.012
MgO	0	0			0.6415	0.001
CaO	0.0049	0.0211			0.0578	0.0083
Na2O	0	0			0.0638	0
K2O	0.0177	0.1248			0.0129	0.0282
P2O5	0.0283	0			0.0377	0.008
V2O3	3.3568	3.3993			2.7935	3.0606
NiO	0.0005	0.0252			0	0.0009
ZrO2	0.262	0.386			0.1208	0.4394
SrO	0	0			0	0
Nb2O5	0.102	0.0137			0.0222	0.0602
BaO	1.7146	1.611			1.5124	1.9746
Cr2O3	0.047	0.1911			0.0885	0.122
sum	100.896	101.548			101.193	103.165

## Sheet: Zircon
Supplementary Data 2. EPMA data of Zircon
Sample	ERN-KU							ERN-DV
Location	Kanmer							Dholavira
spot	1	2	3	4	5			1
SiO2	31.5861	31.0452	29.191	31.6707	31.4605			32.3741
TiO2	0.059	0.0972	0.2278	0.0172	0.0231			0.0299
Al2O3	0	4.8973	2.1315	0.0006	0.0066			1.1164
FeO	0.1808	0.6292	0.7905	0.2462	0.1535			0.1909
MnO	0	0.0038	0.0208	0.007	0			0
MgO	0.0635	0.0548	0.9634	0	0.2292			0.0513
CaO	0.0075	0.059	0.1599	0	0.0231			0.0142
Na2O	0	0	0	0	0			0
K2O	0.0037	0.0323	1.0091	0.0007	0			0.0944
P2O5	0.072	0.748	3.9634	0.0456	0			0.1426
V2O3	0	0.0468	0.1155	0	0			0.0192
NiO	0	0.0277	0	0	0.0157			0.0074
ZrO2	65.3496	59.7023	51.0445	66.534	66.6251			65.5326
SrO	0.1104	0.1132	0.0968	0.1037	0.1036			0.1447
Nb2O5	0	0	0	0	0			0
BaO	0	0.064	0.2889	0	0			0.051
Cr2O3	0	0.0198	0.0031	0	0.0009			0
sum	97.4326	97.5406	90.0062	98.6257	98.6413			99.7687
